# Supplementary material for: The Burkholderia cenocepacia Type VI Secretion System Effector TecA Is a Virulence Factor in Mouse Models of Lung Infection
Source: PubMed Central journal article supplement (PMC8546862; doi:10.1128/mbio.02098-21), 2021-09-28

**FIG S6.**

**A)**

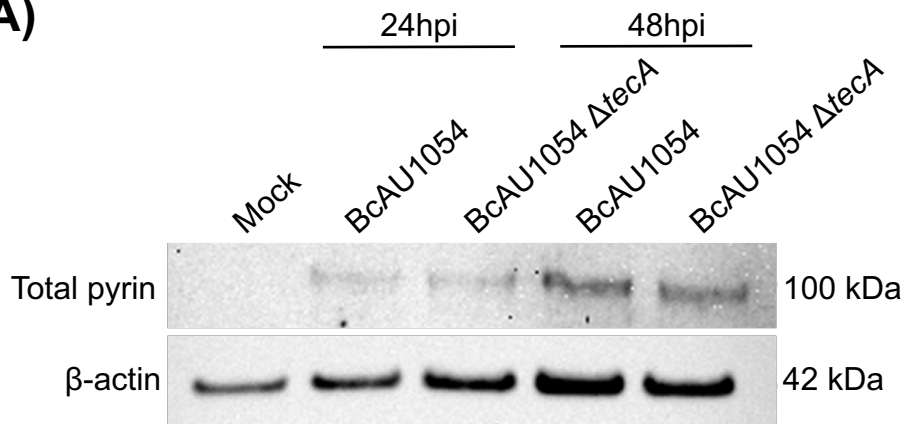

Supplement: mbio.02098-21-sf006.pdf [file mbio.02098-21-sf006.pdf]
