# Supplementary material for: The Burkholderia cenocepacia Type VI Secretion System Effector TecA Is a Virulence Factor in Mouse Models of Lung Infection
Source: PubMed Central journal article supplement (PMC8546862; doi:10.1128/mbio.02098-21), 2021-09-28
Supplement: mbio.02098-21-st001.pdf [file mbio.02098-21-st001.pdf]

**Table S1.**

| <b>Summary of semi-quantitative scoring of lung inflammation and damage.</b> |                                          |                                                                                 |                                                                                                                                                                         |
|------------------------------------------------------------------------------|------------------------------------------|---------------------------------------------------------------------------------|-------------------------------------------------------------------------------------------------------------------------------------------------------------------------|
| <b>Timepoint</b>                                                             | <b>Condition</b>                         | <b>Bronchioles</b>                                                              | <b>Alveoli</b>                                                                                                                                                          |
| <b>12hpi</b>                                                                 | <b>Mock</b>                              | Normal                                                                          | Normal                                                                                                                                                                  |
|                                                                              | <b>BcAU1054</b>                          | Intraluminal neutrophilic and mononuclear cell infiltrate, mild, multifocal     | Neutrophilic and histiocytic inflammatory infiltrate, multifocal, mild<br>Alveolar collapse: mild, multifocal<br>Alveolar septal thickening: mild, multifocal           |
|                                                                              | <b>Bc AU1054 <math>\Delta</math>tecA</b> | Intraluminal neutrophilic and mononuclear cell infiltrate, moderate, multifocal | Neutrophilic and histiocytic inflammatory infiltrate, moderate, multifocal<br>Alveolar collapse: mild, multifocal<br>Alveolar septal thickening: mild, multifocal       |
| <b>3dpi</b>                                                                  | <b>Mock</b>                              | Normal                                                                          | Normal                                                                                                                                                                  |
|                                                                              | <b>BcAU1054</b>                          | Intraluminal neutrophilic and mononuclear cell infiltrate, mild, multifocal     | Neutrophilic and histiocytic inflammatory infiltrate, marked, multifocal<br>Alveolar collapse: moderate, multifocal<br>Alveolar septal thickening: moderate, multifocal |
|                                                                              | <b>Bc AU1054 <math>\Delta</math>tecA</b> | Intraluminal neutrophilic and mononuclear cell infiltrate, mild, multifocal     | Neutrophilic and histiocytic inflammatory infiltrate, marked, multifocal<br>Alveolar collapse: marked, multifocal<br>Alveolar septal thickening: marked, multifocal     |
